# Supplementary material
Source: publisher figshare collection journal article supplement (https://gsajournals.figshare.com/articles/dataset/_/5986933)
Supplement: Supplementary file 1 [file 1]

## Sheet: Table S1
Table S1. Prediction abilities of GBLUP, EGBLUP, LEGBLUP, and HGBLUP for 26 traits in the rice data set.
Model	Culm_habit	Flag_leaf_length	Flag_leaf_width	Awn_presence	Panicle_number	Plant_height	Panicle_length	Panicle_branch_num	Seed_number_perPan	Florets_perPan	Panicle_fertility	Seed_length	Seed_width	Seed_volume	Seed_surface_area	Brown_seed_length	Brown_seed_width	Brown_surface_area	Brown_rice_volume	Seed_LenWid_ratio	Brown_rice_LenWid_ratio	Blast_resistance	Amylose_content	Alkali_spreading	Protein_content	FT_Arkansas07
GBLUP	0.705752	0.495586	0.755416	0.436825	0.820128	0.755761	0.668372	0.624803	0.575173	0.660225	0.549068	0.751663	0.829958	0.811887	0.778676	0.785701	0.834811	0.765912	0.819134	0.795193	0.812795	0.682354	0.800769	0.501085	0.438165	0.605529
EGBLUP	0.709257	0.490599	0.757581	0.450113	0.821172	0.75477	0.670718	0.632597	0.58381	0.662074	0.571013	0.747998	0.829641	0.812607	0.778588	0.783176	0.834719	0.766445	0.819798	0.792916	0.810472	0.68231	0.807398	0.507453	0.451013	0.619034
LEGBLUP_2	0.709763	0.494319	0.756403	0.43491	0.820747	0.751698	0.669237	0.626156	0.576364	0.658361	0.552359	0.748515	0.828235	0.810398	0.776938	0.78412	0.833713	0.765152	0.817728	0.792548	0.810918	0.681683	0.802233	0.502777	0.444806	0.606635
LEGBLUP_3	0.70717	0.492106	0.756655	0.433362	0.820342	0.754069	0.668379	0.626561	0.575035	0.658476	0.551728	0.748782	0.828373	0.810552	0.77735	0.784122	0.833524	0.766281	0.818572	0.792404	0.810775	0.681326	0.802038	0.502401	0.4419	0.60679
LEGBLUP_4	0.708329	0.492598	0.757185	0.437439	0.820254	0.754961	0.669087	0.626121	0.575069	0.658659	0.552189	0.74901	0.828279	0.810091	0.777322	0.783793	0.833467	0.766353	0.818043	0.793378	0.811436	0.681096	0.801808	0.502923	0.442272	0.607391
LEGBLUP_5	0.708804	0.491768	0.756897	0.436135	0.82018	0.75422	0.668632	0.626259	0.576683	0.658581	0.55173	0.748669	0.828071	0.810505	0.776607	0.784762	0.833123	0.765399	0.817683	0.793203	0.811431	0.681806	0.802602	0.50241	0.441183	0.6068
LEGBLUP_6	0.708124	0.493594	0.757179	0.434554	0.82051	0.754416	0.668804	0.62687	0.575785	0.659088	0.553048	0.749486	0.828602	0.810797	0.776735	0.784523	0.833655	0.76628	0.818385	0.793294	0.811429	0.68114	0.802097	0.502937	0.444157	0.608528
LEGBLUP_7	0.708829	0.490473	0.757329	0.436564	0.820115	0.754326	0.669347	0.627562	0.575861	0.65833	0.553673	0.748443	0.828008	0.810607	0.776972	0.784012	0.833346	0.766467	0.818548	0.79347	0.81124	0.681297	0.802239	0.502773	0.443062	0.607403
LEGBLUP_8	0.708789	0.492735	0.7573	0.436823	0.820439	0.755192	0.669048	0.627168	0.576435	0.658491	0.553578	0.749982	0.828439	0.811094	0.77699	0.783872	0.833818	0.766119	0.817615	0.793487	0.811499	0.682027	0.802711	0.503832	0.442326	0.607869
LEGBLUP_9	0.708954	0.492782	0.756954	0.437121	0.8203	0.755666	0.669496	0.626684	0.576834	0.658436	0.55282	0.749088	0.82863	0.810675	0.776349	0.784095	0.834027	0.766198	0.817828	0.79408	0.81123	0.680949	0.802198	0.502861	0.443553	0.609438
LEGBLUP_10	0.709705	0.490912	0.756885	0.436772	0.820259	0.754186	0.669154	0.627292	0.57601	0.658819	0.553908	0.750117	0.82818	0.810846	0.776397	0.784694	0.833213	0.76629	0.818359	0.792991	0.810796	0.682302	0.802268	0.503354	0.442718	0.608424
HGBLUP_2	0.706316	0.498144	0.757824	0.435909	0.819653	0.751046	0.668719	0.625521	0.575049	0.659107	0.55417	0.745228	0.829522	0.811415	0.775876	0.780358	0.833963	0.765074	0.818277	0.792749	0.809968	0.679896	0.801914	0.504034	0.447636	0.606664
HGBLUP_3	0.70637	0.500417	0.758572	0.435171	0.819177	0.750717	0.665123	0.628175	0.576245	0.658857	0.553051	0.743627	0.829399	0.811972	0.776826	0.77941	0.834512	0.766967	0.819759	0.790846	0.808859	0.679909	0.799253	0.502809	0.449622	0.612017
HGBLUP_4	0.705502	0.497312	0.758908	0.434689	0.817654	0.752942	0.665997	0.627112	0.575973	0.660536	0.553627	0.740822	0.82813	0.810378	0.774075	0.776025	0.833558	0.764154	0.818707	0.791024	0.808322	0.678394	0.802263	0.507211	0.453828	0.612215
HGBLUP_5	0.704871	0.499465	0.757794	0.432238	0.816582	0.746004	0.667682	0.628216	0.576008	0.66166	0.551894	0.73776	0.827972	0.809409	0.771415	0.773588	0.831636	0.762294	0.816371	0.789297	0.80525	0.674908	0.798751	0.507326	0.458628	0.614339
HGBLUP_6	0.703062	0.497407	0.759964	0.428934	0.815683	0.745895	0.664147	0.627698	0.572775	0.659019	0.549311	0.736409	0.827252	0.809358	0.772404	0.773122	0.831412	0.763517	0.816363	0.788747	0.80518	0.672724	0.797652	0.503808	0.453072	0.6113
HGBLUP_7	0.702366	0.499244	0.757023	0.429967	0.815515	0.745384	0.669163	0.624884	0.568598	0.658041	0.549885	0.731829	0.825731	0.806504	0.766933	0.767758	0.830703	0.760899	0.815487	0.787335	0.802034	0.672497	0.798065	0.501398	0.459663	0.617598
HGBLUP_8	0.703458	0.494807	0.756868	0.427531	0.813316	0.741269	0.665394	0.622569	0.568528	0.657855	0.549393	0.731982	0.824418	0.80522	0.76641	0.769093	0.829214	0.758727	0.813657	0.787254	0.802672	0.67255	0.79476	0.507635	0.46043	0.612093
HGBLUP_9	0.699216	0.499563	0.75773	0.425848	0.813016	0.737021	0.663637	0.622141	0.565456	0.651553	0.548128	0.728345	0.823295	0.803647	0.763464	0.764869	0.828581	0.757204	0.812609	0.785909	0.800982	0.667728	0.792915	0.501528	0.461115	0.61212
HGBLUP_10	0.699794	0.493392	0.756593	0.431906	0.812486	0.730964	0.662217	0.622706	0.566288	0.654241	0.550424	0.723472	0.822235	0.802151	0.762125	0.761428	0.826469	0.755063	0.810742	0.781507	0.797566	0.665114	0.789652	0.501596	0.463906	0.6151
GBLUP: Genomic best linear unbiased prediction
EGBLUP: extended genomic best linear unbiased prediction
LEGBLUP: locally extended genomic best linear unbiased prediction
HGBLUP: haplotype-based genomic best linear unbiased prediction
The LEGBLUP and HGBLUP models were implemented with different window length (i.e. number of SNPs), varying from 2 to 10
